# Supplementary material for: Nonvolatile electrical control of the electronic and valleytronic properties by ferroelectricity in the VSi2P4/Al2S3 van der Waals heterostructure
Source: Royal Society of Chemistry journal article supplement (doi:10.1039/d4tc03592e), 2024-10-25
Supplement: d4tc03592e1.pdf [file d4tc03592e1.pdf]

## Supplementary Material

### Nonvolatile electrical control of electronic and valleytronic properties by ferroelectricity in the $\text{VSi}_2\text{P}_4/\text{Al}_2\text{S}_3$ van der Waals heterostructure

Shoubao Zhang<sup>a</sup>, Na Jiao<sup>a</sup>, Hongyan Lu<sup>a</sup>, Mengmeng Zheng<sup>a</sup>, Ping Zhang<sup>ab</sup>, Meiyang Ni<sup>a\*</sup>

<sup>a</sup>School of Physics and Physical Engineering, Qufu Normal University, Qufu 273165, China

<sup>b</sup>Institute of Applied Physics and Computational Mathematics, Beijing 100088, China

Email: nimy@qfnu.edu.cn (MY. Ni)

#### 1. Phonon spectra, magnetic configurations, and energy difference of different magnetic configurations of $\text{VSi}_2\text{P}_4$ and $\text{Al}_2\text{S}_3$ monolayer

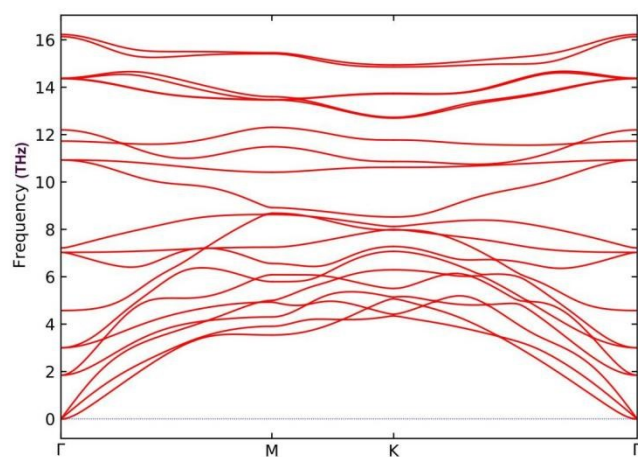

Fig. S1 Phonon spectrum of  $\text{VSi}_2\text{P}_4$  monolayer.

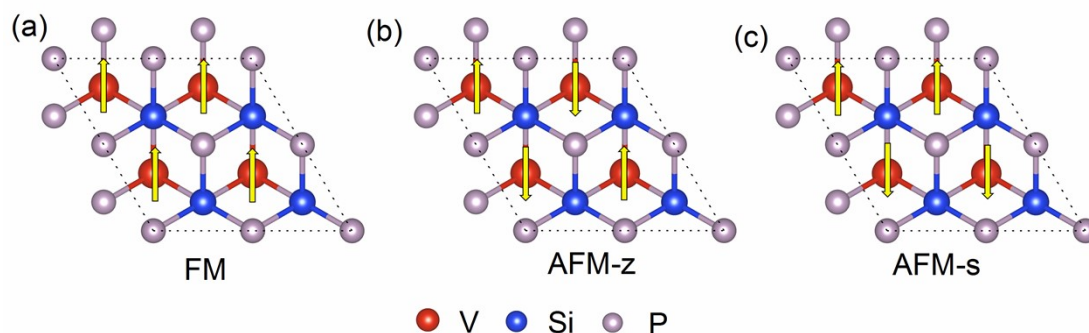

Fig. S2 Different magnetic configurations of monolayer  $\text{VSi}_2\text{P}_4$  for (a) ferromagnetic, (b) zigzag-antiferromagnetic, (c) stripe-antiferromagnetic configurations. The yellow arrow represents the direction of the magnetic moment.

Table S1 The energy difference  $\Delta E = E - E_{FM}$  (in units of eV) of  $\text{VSi}_2\text{P}_4$  monolayer with different magnetic states.

|            | FM | NM    | AFM-z | AFM-s |
|------------|----|-------|-------|-------|
| $\Delta E$ | 0  | 0.106 | 0.013 | 0.013 |

Table. S2: Distribution of magnetic moment on each atom of  $\text{VSi}_2\text{P}_4$  monolayer, UP-1 HS and DW-1 HS.(the unit:  $\mu_B$ )

|                                       | Total | V atom | Si atom | P atom |        |
|---------------------------------------|-------|--------|---------|--------|--------|
| Monolayer<br>$\text{VSi}_2\text{P}_4$ | 0.933 | 1.106  | 0.006   | -0.090 | -0.090 |
|                                       |       |        | 0.006   | -0.002 | -0.002 |
| UP-1                                  | 0.926 | 1.092  | 0.006   | -0.087 | -0.087 |
|                                       |       |        | 0.006   | -0.002 | -0.002 |
| DW-1                                  | 0.939 | 1.110  | 0.006   | -0.088 | -0.088 |
|                                       |       |        | 0.006   | -0.002 | -0.002 |

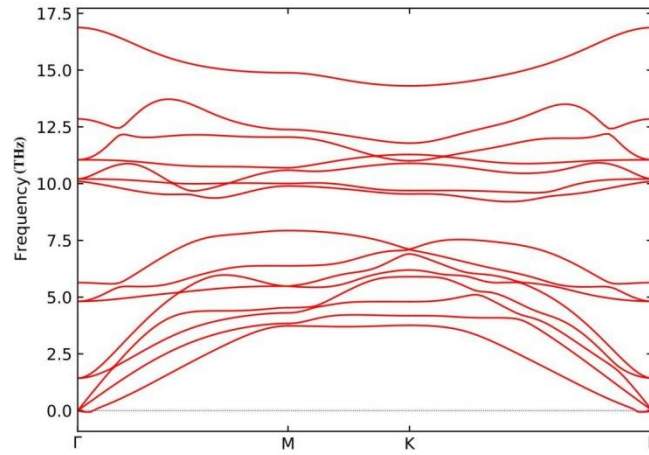

Fig. S3 phonon spectrum of  $\text{Al}_2\text{S}_3$  monolayer.

## 2. Band structures of $\text{VSi}_2\text{P}_4$ and $\text{Al}_2\text{S}_3$ monolayers calculated by HSE06 method

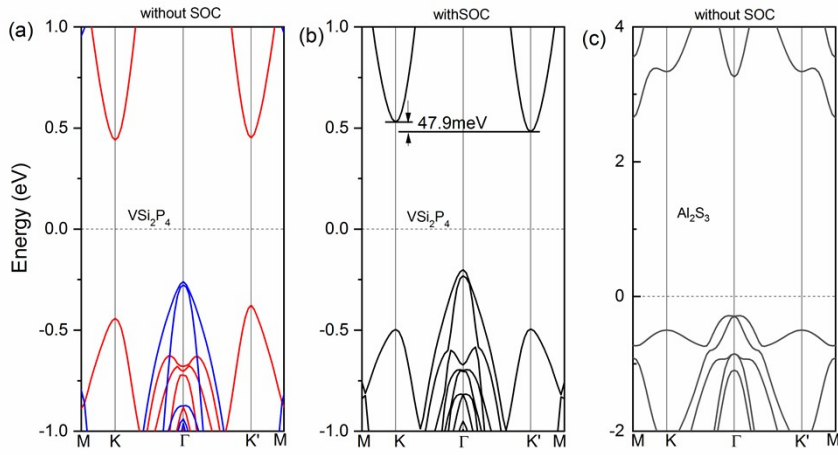

Fig. S4 Band structures calculated by the hybrid functional (HSE06) method: panel (a) and (b) are for the  $\text{VSi}_2\text{P}_4$  monolayer without and with SOC, and panel (c) is for the  $\text{Al}_2\text{S}_3$  monolayer without SOC.

### 3. Various configurations of the $\text{VSi}_2\text{P}_4/\text{Al}_2\text{S}_3$ heterostructure and the energy difference of $\text{VSi}_2\text{P}_4/\text{Al}_2\text{S}_3$ heterostructures with different magnetic states

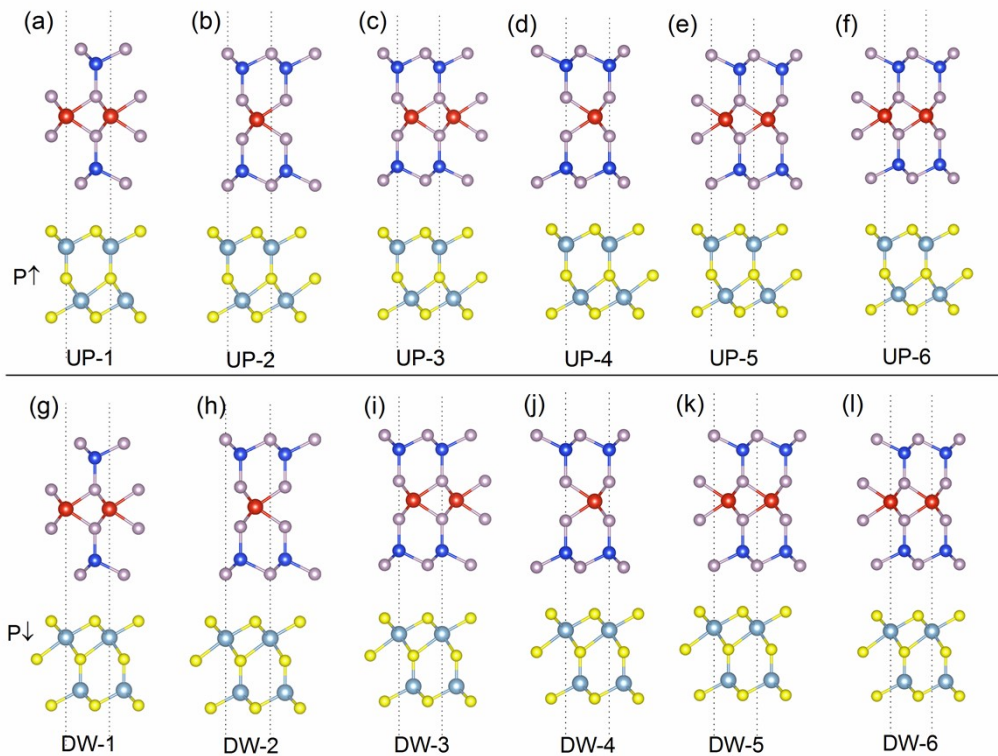

Fig. S5 Six stacking configurations of the  $\text{VSi}_2\text{P}_4/\text{Al}_2\text{S}_3$  heterostructures (side view). (a)-(f) show six stacking configurations with the electric polarization of  $\text{Al}_2\text{S}_3$  upwards. (g)-(l) show six stacking configurations with the electric polarization of  $\text{Al}_2\text{S}_3$  downwards.

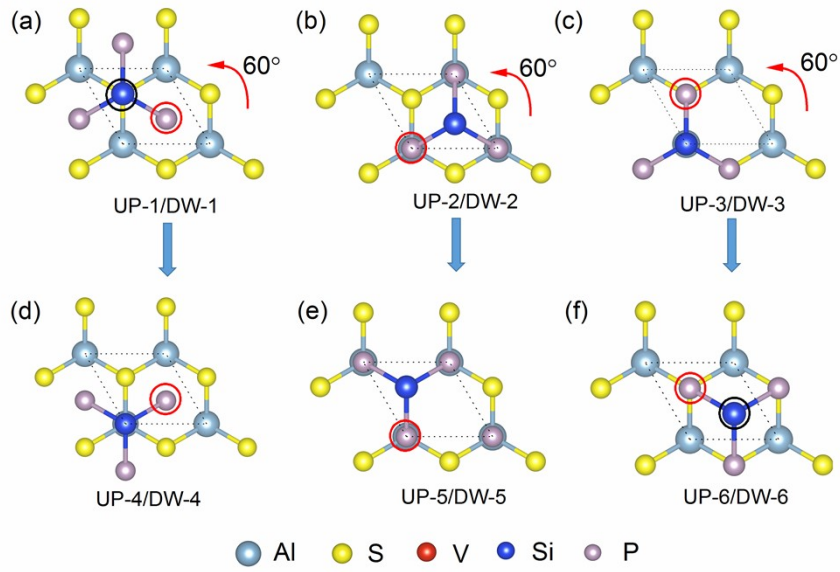

Fig. S6 Six stacking configurations of the  $\text{VSi}_2\text{P}_4/\text{Al}_2\text{S}_3$  heterostructures (top view). To make it clear, just two adjacent layers of  $\text{VSi}_2\text{P}_4$  and  $\text{Al}_2\text{S}_3$  are shown. Configurations (d-f) are obtained by rotating  $60^\circ$  counterclockwise of  $\text{VSi}_2\text{P}_4$  in configurations (a-c) with P atom (in red circle) as the center with  $\text{Al}_2\text{S}_3$  unmoved.

Table S3 The energy difference  $\Delta E = E - E_{FM}$  (in units of eV) of UP-1 and DW-1 heterostructures with different magnetic states.

|      | FM | NM    | AFM-z | AFM-s |
|------|----|-------|-------|-------|
| UP-1 | 0  | 0.992 | 0.130 | 0.130 |
| DW-1 | 0  | 0.868 | 0.132 | 0.232 |

Table S4 The energy difference  $\Delta E = E - E_{UP-1(DW-1)}$  of heterostructures with different stacking configurations.

|                        |      |      |      |      |      |      |
|------------------------|------|------|------|------|------|------|
| configuration          | UP-1 | UP-2 | UP-3 | UP-4 | UP-5 | UP-6 |
| $\Delta E(\text{meV})$ | 0    | 2.3  | 56.0 | 4.4  | 0.7  | 56.5 |
| configuration          | DW-1 | DW-2 | DW-3 | DW-4 | DW-5 | DW-6 |
| $\Delta E(\text{meV})$ | 0    | 6.5  | 58.7 | 2.1  | 2.8  | 59.1 |

#### 4. Band structures and charge density difference of the $\text{VSi}_2\text{P}_4/\text{Al}_2\text{S}_3$ heterostructures

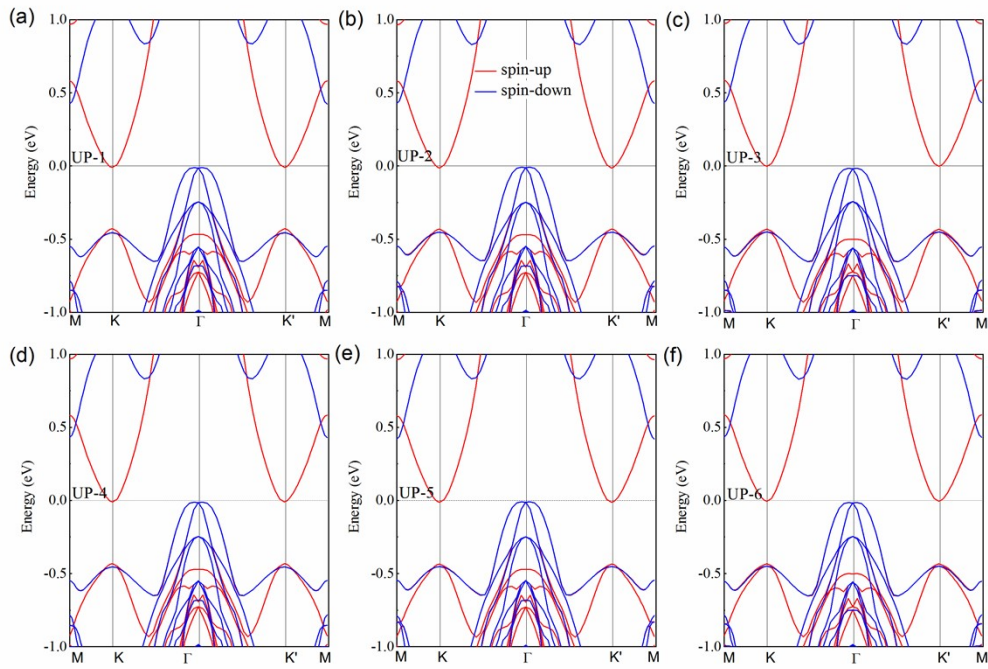

Fig. S7. Electronic band structures of the configurations UP-1 to UP-6 without considering SOC. Red and blue lines represent the spin-up and spin-down channels of HSs.

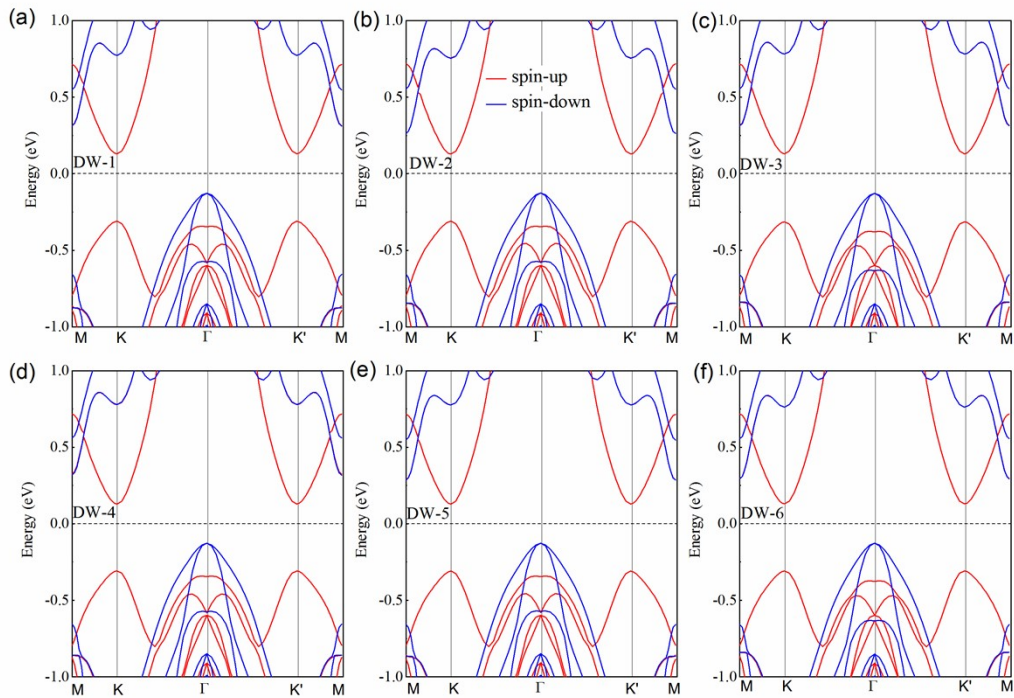

Fig. S8. Electronic band structures of the configurations DW-1 to DW-6 without considering SOC. Red and blue lines represent the spin-up and spin-down channels of HSs.



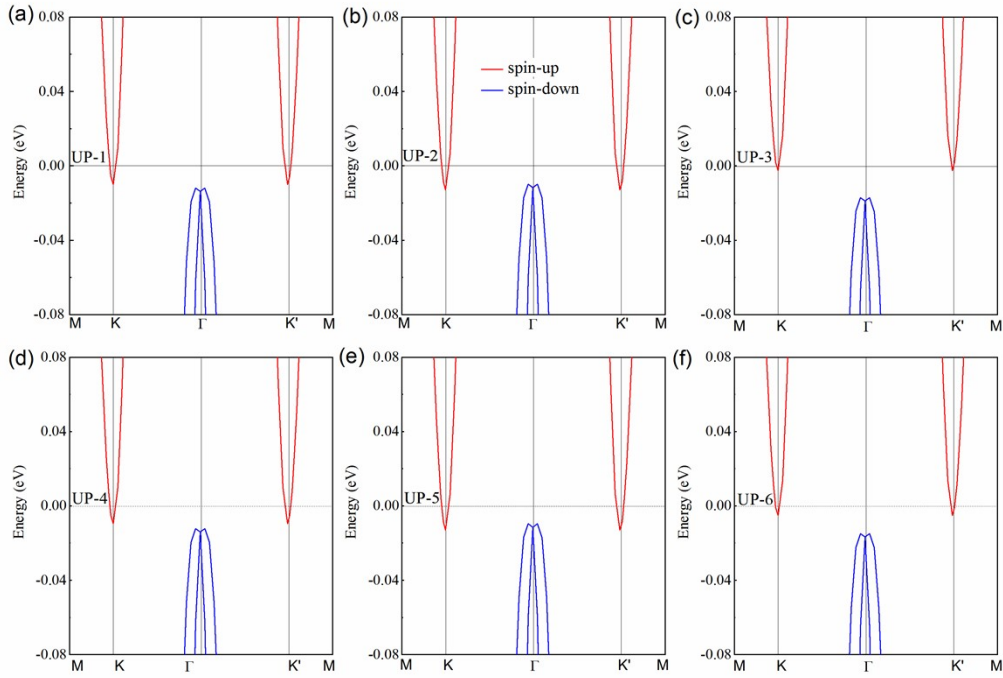

Fig. S9. Electronic band structures of the configurations UP-1 to UP-6 without considering SOC. Compared with Fig. S5, the range of the energy of this figure is limited around the Fermi level. Red and blue lines represent the spin-up and spin-down channels of HSs.

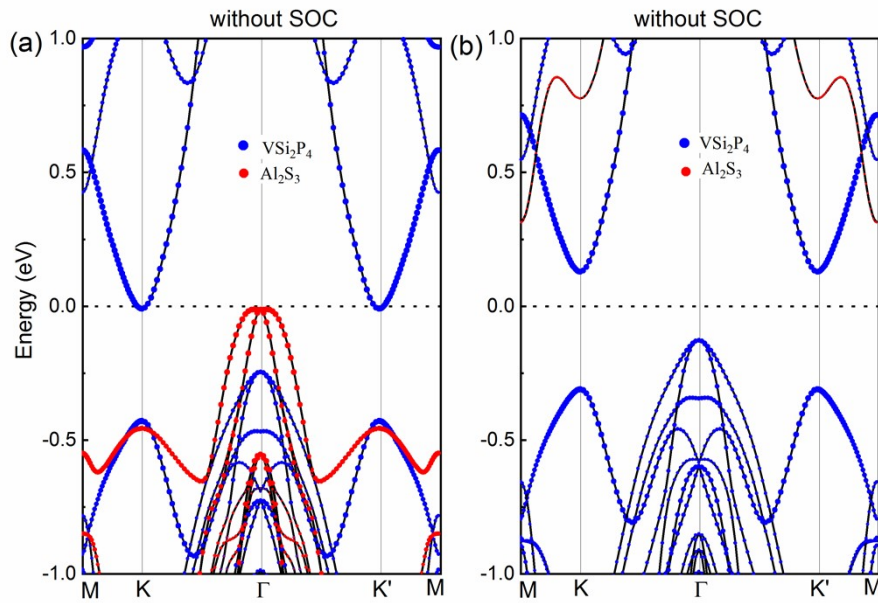

Fig. S10 Projected band structures of (a) UP-1 and (b) DW-1 configurations without SOC. Red and blue lines represent the contributions from spin-up and spin-down channel, and the blue and red dots denote the contributions from  $\text{VSi}_2\text{P}_4$  and  $\text{Al}_2\text{S}_3$ .

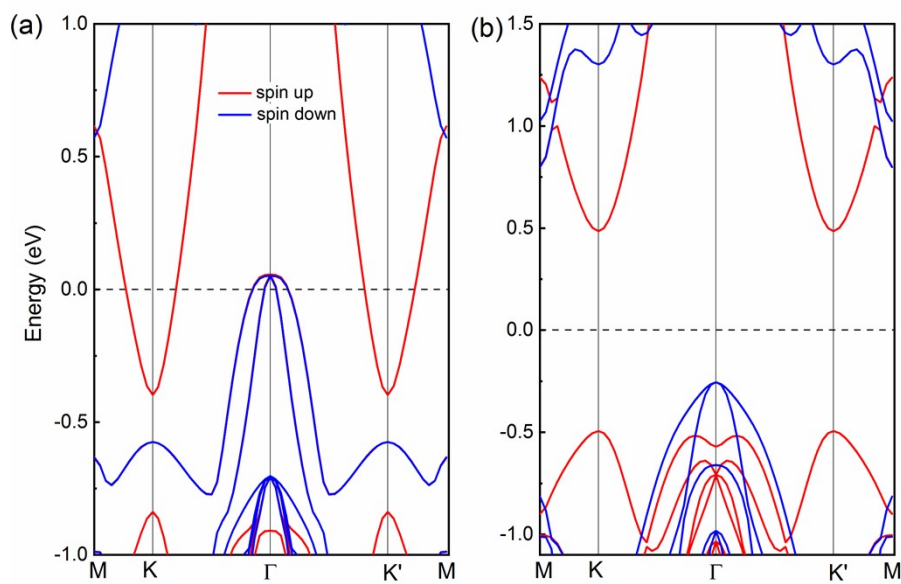

Fig. S11. Electronic band structures of the configurations UP-1 to UP-6 with HSE06 method. Red and blue lines represent the spin-up and spin-down channels of HSs.

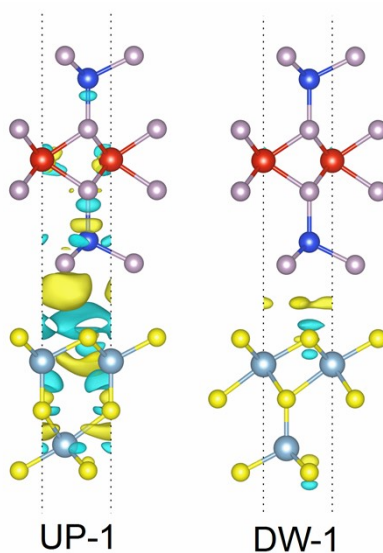

Fig. S12 The charge density difference of UP-1 and DW-1 heterostructures. The blue and yellow distributions represent the charge depletion and accumulation with an isosurface value of  $1.2 \times 10^{-4} \text{ e \AA}^{-3}$ , respectively.

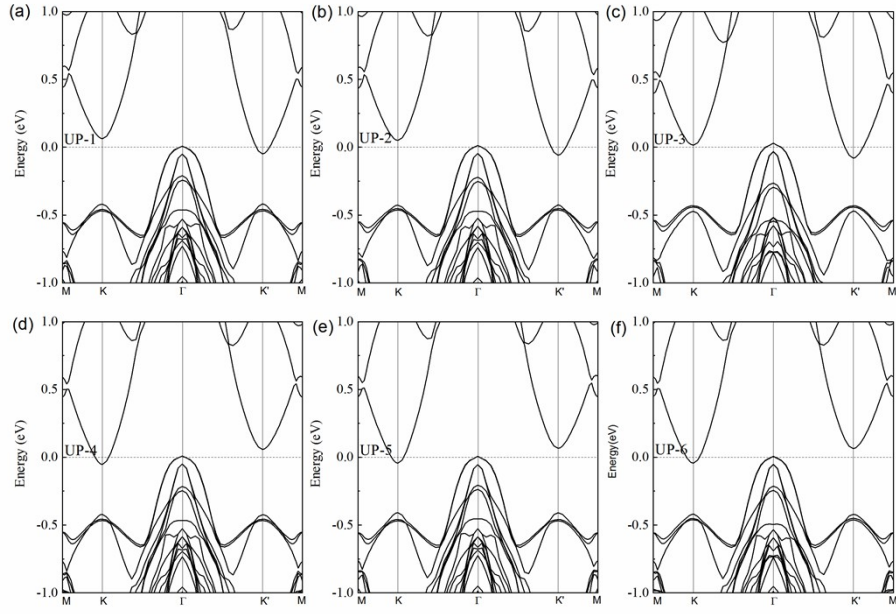

Fig. S13. Electronic band structures of the configurations UP-1 to UP-6 considering SOC.

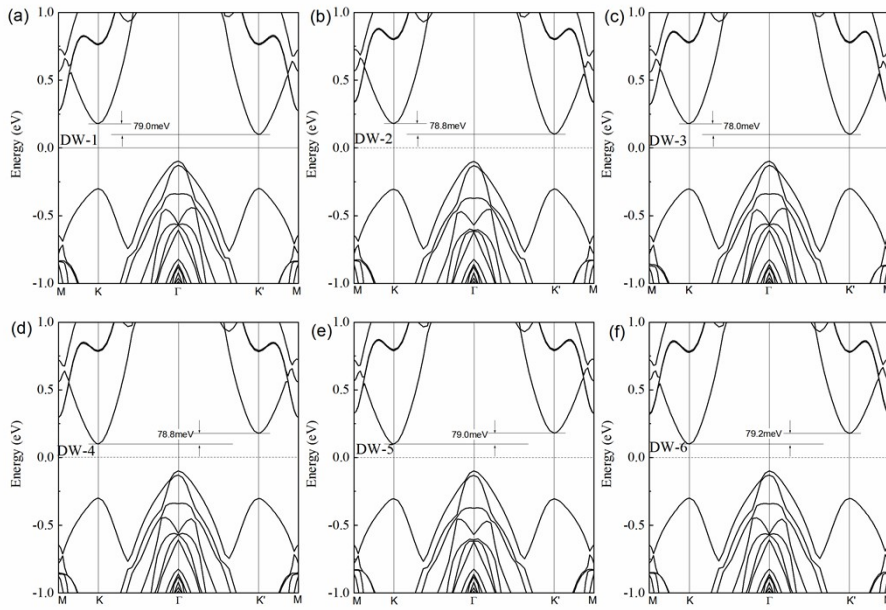

Fig. S14. Electronic band structures of the configurations DW-1 to DW-6 considering SOC.
